# Supplementary material for: Adiponectin aggravates bone erosion by promoting osteopontin production in synovial tissue of rheumatoid arthritis
Source: PubMed Central journal article supplement (PMC5806355; doi:10.1186/s13075-018-1526-y), 2018-02-08

# Additional file 1: Figure S1

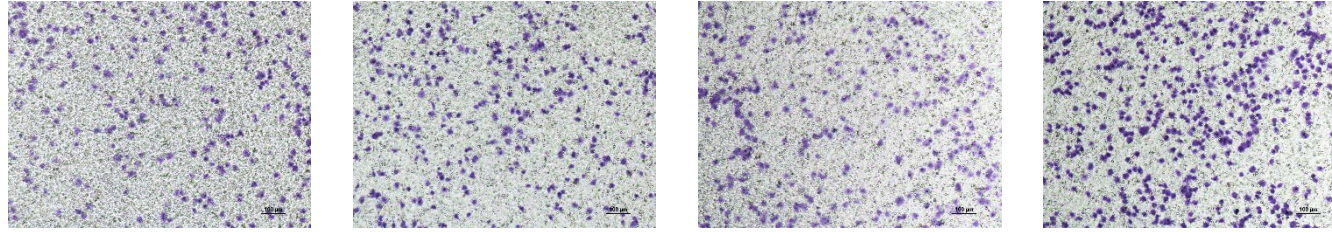

|             |   |   |   |   |
|-------------|---|---|---|---|
| OASF        | + | + | - | - |
| RASF        | - | - | + | + |
| AD (1μg/ml) | - | + | - | + |

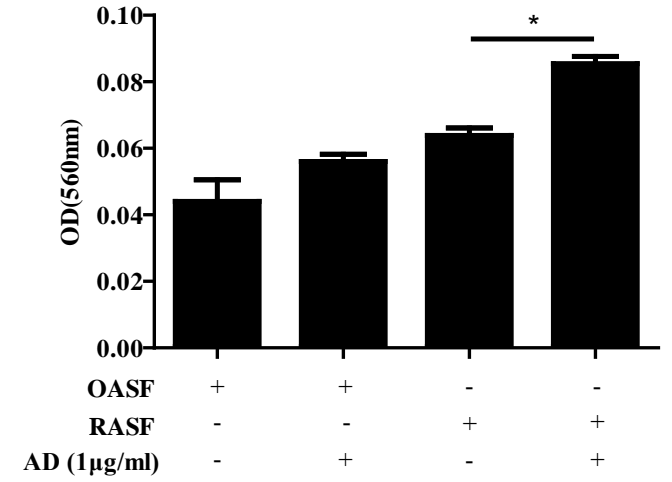

Supplement: 13075_2018_1526_MOESM1_ESM.pdf [file 13075_2018_1526_MOESM1_ESM.pdf]
