# Supplementary material for: Adiponectin aggravates bone erosion by promoting osteopontin production in synovial tissue of rheumatoid arthritis
Source: PubMed Central journal article supplement (PMC5806355; doi:10.1186/s13075-018-1526-y), 2018-02-08

Additional file 2: Figure S2

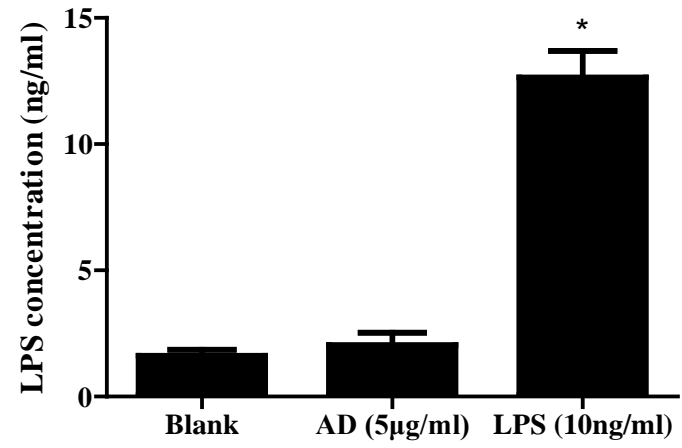

Supplement: 13075_2018_1526_MOESM2_ESM.pdf [file 13075_2018_1526_MOESM2_ESM.pdf]
